# Supplementary material
Source: publisher site journal article supplement (http://www.degruyter.com/publication/journal_key/PUBHEF/downloadAsset/PUBHEF_Author%20Statement.pdf)
Supplement: Supplementary file 1 [file PUBHEF_Author%20Statement.pdf]

## AUTHOR'S STATEMENTS

### CONFLICT OF INTEREST

To ensure fair and objective decision-making, authors must declare any associations that pose a conflict of interest (financial, personal or professional) in connection with evaluated manuscripts.

If there are no conflicts of interest, the following statement should be included before the References (or at the end of the Acknowledgments section):

*Conflict of interest: Authors state no conflict of interest*

### INFORMED CONSENT

The protection of privacy is a legal right that must not be breached without individual informed consent. In cases where the identification of personal information is necessary for scientific reasons, authors should obtain full documentation of informed consent, including written permission from the patient prior to inclusion in the study.

The following (or similar) statement should be included in the Methods section: *Informed consent: Informed consent has been obtained from all individuals included in this study.*

### AUTHORIZATION FOR THE USE OF HUMAN SUBJECTS

Manuscripts containing information related to human use should clearly state that the research has complied with all relevant national regulations and institutional policies and has been approved by the authors' institutional review board or equivalent committee.

Copies of the guidelines and policy statements must be available for review by the Managing Editor if necessary. The editors reserve the right to seek additional information or guidance from reviewers on any cases in which concerns arise.

All investigation with human subjects must have been conducted by following the tenets of the [Helsinki Declaration](#), what is more authors must identify the committee or review board approving the experiments, and provide a statement indicating approval of the research.

The following (or similar) statement should be included in the Methods section:

*Ethical approval: The research related to human use complied with all the relevant national regulations and institutional policies and was performed in accordance with the tenets of the Helsinki Declaration, and has been approved by the authors' institutional review board or equivalent committee.*

### AUTHORIZATION FOR THE USE OF EXPERIMENTAL ANIMALS

Manuscripts containing information related to animals use should clearly state that the research has complied with all relevant national regulations and institutional policies and has been approved by the authors' institutional review board or equivalent committee.

Copies of the guidelines and policy statements must be available for review by the Managing Editor if necessary. The editors reserve the right to seek additional information or guidance from reviewers on any cases in which concerns arise. The research using animal subjects should be conducted according to the Principles of Laboratory Animal Care and similar documents (e.g. <http://grants.nih.gov/grants/olaw/olaw.htm>). For manuscripts reporting experiments on live vertebrates or higher invertebrates, authors must identify the committee approving the experiments, and must confirm that all experiments were performed in accordance with relevant regulations.

The following (or similar) statement should be included in the Methods section:

*Ethical approval: The research related to animals use complied with all the relevant national regulations and institutional policies for the care and use of animals.*

**If the manuscript does not contain any study that requires human or animal ethical approval**, the following statement should be included in the Methods section:

*Ethical approval: The conducted research is not related to either human or animals use.*
